# Supplementary material for: Analysis of Biobanked Serum from a Mycobacterium avium subsp paratuberculosis Bovine Infection Model Confirms the Remarkable Stability of Circulating miRNA Profiles and Defines a Bovine Serum miRNA Repertoire
Source: PLoS One. 2015 Dec 16;10(12):e0145089. doi: 10.1371/journal.pone.0145089 (PMC4682966; doi:10.1371/journal.pone.0145089)
Supplement: S2 Table — (CSV) [file pone.0145089.s008.csv]

	#miRNA	read_count	mean_norm	miRDeep2 score	chr	seed	precursor	precursor coordinate	freq	mirbase seed match	star read count	rfam alert	consensus mature sequence	consensus star sequence	consensus precursor sequence
0	12_3861	15465.0	65011.62491228071	4.0	12	auggauu	12_3861	12:69698007..69698073:-	1.0	hsa-miR-1246	0	-	uauggauuuuuggagcaggga	caugcaucgaccuagu	uauggauuuuuggagcagggaguuggaauaggagcuugcucuguccacuccaugcaucgaccuagu
1	14_5598	1917.0	5910.34842105263	852.3	14	cccacuc	14_5598	14:71406692..71406740:-	1.0	-	347	-	acccacuccaguacucuugcc	gaagauccccuggagaag	gaagauccccuggagaaggaaacggcaacccacuccaguacucuugcc
2	20_11630	718.0	2207.3241176470588	5.1	20	ggaugag	20_11630	20:17904153..17904232:-	0.8947368421052632	hsa-miR-1255a	0	-	aggaugagcugguuggcuggc	cagcugugaucaguuugcuca	cagcugugaucaguuugcucaccaucccucuccugaauggaggagaagggaacaacagaggaugagcugguuggcuggc
3	28_16560	471.0	1658.114782608696	5.3	28	cugaaag	28_16560	28:9347067..9347134:-	0.8070175438596491	hsa-miR-4766-5p	0	-	ccugaaagcucuccaaac	guggggggcaggggggag	guggggggcaggggggagguaucaucucccaguguggagauguuugcaaccugaaagcucuccaaac
4	13_4103	308.0	1026.8596296296298	165.4	13	uugcuga	13_4103	13:39299094..39299164:+	0.9473684210526315	-	2	-	cuugcugagugaccucccugcu	cagggaggugucucagugacaag	cagggaggugucucagugacaaguuuaaucccccuggggcuuuacaaacuugcugagugaccucccugcu
5	9_24296	304.0	1314.6779245283017	5.1	09	auaaagu	9_24296	9:86842891..86842959:+	0.9298245614035088	hsa-miR-142-5p	4	-	aauaaaguuuguuuggguuuu	aagaaacuuuuuggccaacc	aauaaaguuuguuuggguuuuucuguaaggugauauggaaaaaucugaaagaaacuuuuuggccaacc
